# Supplementary material for: BioMart Central Portal—unified access to biological data
Source: PubMed Central journal article supplement — Nucleic Acids Res. 2009 May 6;37(Web Server issue):W23–7. doi: 10.1093/nar/gkp265 (PMC2703988; doi:10.1093/nar/gkp265), 2009-05-06
Supplement: gkp265_1.pdf [file gkp265_1.pdf]

## Supplementary Data

**Table S1:** Usage statistics of BioMart central portal from January 2008 to March 2009.

\* represents *not viewed traffic* that includes traffic generated by robots, worms, or replies with special HTTP status codes.

| Month  | Unique visitors | Hits                | Web service hits % | Web browser hits % |
|--------|-----------------|---------------------|--------------------|--------------------|
| Jan-08 | 2909            | 428086<br>976145*   | 81                 | 19                 |
| Feb-08 | 2888            | 734897<br>986085*   | 90                 | 10                 |
| Mar-08 | 3081            | 729674<br>1423416*  | 89                 | 11                 |
| Apr-08 | 3221            | 2107338<br>1111428* | 95                 | 5                  |
| May-08 | 3341            | 346761<br>1145260*  | 65                 | 35                 |
| Jun-08 | 3283            | 462849<br>937198*   | 70                 | 30                 |
| Jul-08 | 3263            | 537002<br>1717997*  | 73                 | 27                 |
| Aug-08 | 3006            | 455483<br>1817226*  | 74                 | 26                 |
| Sep-08 | 3426            | 331093<br>1265288*  | 60                 | 40                 |
| Oct-08 | 3925            | 1507744<br>1893233* | 90                 | 10                 |
| Nov-08 | 4051            | 1147805<br>1548501* | 86                 | 14                 |
| Dec-08 | 3428            | 669248<br>1855186*  | 78                 | 22                 |
| Jan-09 | 3792            | 706630<br>2037273*  | 82                 | 18                 |
| Feb-09 | 3756            | 359248<br>1814978*  | 58                 | 42                 |
| Mar-09 | 4447            | 568756<br>2690081*  | 59                 | 41                 |
